# Supplementary material for: Reactivity of an anionic Pd(ii) metallacycle with CH2X2(X = Cl, Br, I): formal insertion of methylene into a Pd–Carylbond
Source: Royal Society of Chemistry journal article supplement (doi:10.1039/b403411b), 2004-01-01
Supplement: b403411b.doc [file b403411b.doc]

**For Electronic Supplementary Information**

**Reaction of of with CH2X2 (X = Cl, Br, I): Formal Insertion of Methylene into a Pd-Caryl Bond.**

Juan Cámpora,* Pilar Palma,* Diego del Río, Jorge A. López

Instituto de Investigaciones Químicas, Consejo Superior de Investigaciones Científicas-Universidad de Sevilla, Avda. Américo Vespucio s/n, 41092, Sevilla, Spain. Fax: 34 954460565; Tel: 34 954489555; E-mail: campora@iiq.csic.es, ppalma@iiq.csic.es

Pedro Valerga

Departamento de Ciencia de Materiales, Ingeniería Metalúrgica y Química Inorgánica, Facultad de Ciencias, Universidad de Cádiz, Apdo. 40, 11510, Puerto Real, Cádiz, Spain

General Information……………………………………….……………………………..3

Synthesis and characterization data of:

**(2a)** …..………………………..3

(**4b**)………………..………..4

(**4c**)……………..…………….4

1,1-dimethylindan (**5**)……………………………………………………..7

X-ray crystallographic data of:

(**4b**)………………..………..8

References …………………………………………………………………….……....….15

**General Information.**

All preparations and other operations were carried out under oxygen-free nitrogen by conventional Schlenk techniques. Solvents were rigorously dried and degassed before use. The complex 1and the potassium salt of hydrothipirazolylborate (KTp)2 were prepared according to published procedures. Microanalyses were performed by the Microanalytical Service of the Instituto de Investigaciones Químicas (Sevilla, Spain). Infrarred spectra were recorded on a Bruker Vector 22 spectrometer, and NMR spectra on Bruker DRX 300, 400 and 500 MHz spectrometers. The 1H and 13C{1H} resonances of the solvent were used as the internal standard but the chemical shifts are reported with respect to TMS. The assignment of NMR spectra has been done with the help of bidimensional spectra (1H-1H COSY, 1H-1H NOESY, 1H-13C HMQC and 1H-13C HMBC). The notation used for complexes (**4b**) and (**4c)** is shown in Figure ESI-1

Figure ESI-1

**Synthesis and characterization data of (2a)**

A solution of 252 mg (1 mmol) of KTp in 10 ml of acetone was added to 346 mg (1 mmol) of complex dissolved in 30 ml of acetone and the mixture was stirred at room temperature for one hour. The solvent was removed under reduced pressure, 30 ml of CH2Cl2 were added and the resulting solution was stirred at room temperature for 36 hours and then filtered through a small silica column. The solvent was evaporated resulting a pale yellow oil that was washed with petroleum ether at -80 ºC, affording complex (**2a**) as a white microcrystalline solid. Yield: 50 %.

Analytical and spectroscopic data for (**2a**)

Anal. Calc. for C20H24ClBN6Pd: C, 47.94, H, 4.83, N, 16.77. Found: C, 47.48, H, 4.93, N, 16.13. 1H NMR (CD2Cl2, 20 ºC)  1.50 and 1.58 (s, 3H, C*Me2*), 3.65 and 4.17 (d, 1H, 2*J*HH = 7.9 Hz, C*H2*), 4.60 and 4.68 (d, 1H, 2*J*HH = 5.9 Hz, C*H2*Cl), 6.08, 6.30, 6.41 (t, 1H, 3*J*HH = 2.2 Hz, C*H(4)pz*), 6.89 (d, 1H, 3*J*HH = 2.0 Hz, C*Hpz*), 6.89, 7.02 and 7.14 (m, 1H, Car*H*), 7.69, 7.78 and 7.82 (d, 1H, *J*HH = 2.3 Hz, C*Hpz*), 7.84 and 8.03 (d, 1H, *J*HH = 2.3 Hz, C*Hpz*). 13C{1H} NMR (CD2Cl2, 20 ºC)  32.6 and 34.4 (s, C*Me2*), 41.0 (s, *C*H2Cl), 47.1 (s, *C*Me2), 64.3 (s, *C*H2), 105.3, 105.5 and 105.7 (s, *C*H(4)pz), 125.7, 125.8, 127.0 and 131.8 (s, *Car*H), 135.3, 135.6 and 135.7 (s, *C*H(3)pz), 139.8, 140.1 and 140.3 (s, *C*H(5)pz), 156.5 (s, *C*(1)ar) and 162.5 (s, *C*(2)ar).

**Synthesis and characterization data of** (X = Br **(4b)** and I **(4c)**).

Compounds (**4b**) and (**4c**) were similarly prepared following the procedure described below for complex **4b**:

A solution of 376 mg (1 mmol) of complex in 30 ml of acetone was treated with 252 mg (1 mmol)of KTp dissolved in 20 ml of acetone and the mixture stirred at room temperature for one hour. The solution was cooled at -80 ºC and 0.7 ml (10 mmol) of CH2Br2  were added. The mixture was then allowed to reach room temperature slowly (12 hours) and stirred at this temperature for 4 hours, being the ratio of complexes **3b**:**4b**: 1:2 (determined by 1H NMR). The separation of these products was difficult, due to their tendency to co-crystallize. These were purified by spinning band chromatography, under inert atmosphere, using a mixture of Et2O and petroleum ether (1:49) as the mobile phase. Complex **4b** can be obtained analytically pure when the solution of the complex was evaporated under vacuum, and the resulting solid washed with an 1:1 mixture of Et2O and petroleum ether (3 x 5 ml). Yield 5 %.

Analytical and spectroscopic data for (**4b**)

Anal. Calc. for C20H24BBrN6Pd: C, 44.00, H, 4.40, N, 15.40 Found: C, 43.56, H, 3.88, N, 15.24. 1H NMR (CD2Cl2, 20 ºC)  1.54 and 1.70 (s, 3H, C*Me2*), 3.79 (d, 1H, 2*J*HH = 7.1 Hz, C*H2*(A)), 4.07 (d, 1H, 2*J*HH = 8.6 Hz, C*H2*(B)), 4.75 (d, 1H, 2*J*HH = 7.1 Hz, C*H2*(A)), 5.21 (d, 1H, 3*J*HH = 2.3 Hz, C*H*(5-C)pz), 5.88 (t, 1H, 3*J*HH = 2.4 Hz, C*H*(4-C)pz), 6.25 (t, 1H, 3*J*HH = 2.1 Hz, C*H*(4-B)pz), 6.33 (d, 1H, 2*J*HH = 8.6 Hz, C*H2*(B)), 6.35 (t, 1H, 3*J*HH = 2.3 Hz, C*H*(4-A)pz), 7.07 (tm, 1H, 3*J*HH = 7.3 Hz, Car*H(4)*), 7.12 (dm, 1H, 3*J*HH = 7.5 Hz, Car*H(3)*), 7.38 (tm, 1H, 3*J*HH = 7.5 Hz, Car*H(5)*), 7.46 (dm, 1H, 3*J*HH = 7.8 Hz, Car*H(6)*), 7.62 (d, 1H, 3*J*HH = 2.4 Hz, C*H*(3-C)pz), 7.66 (d, 1H, 3*J*HH = 2.3 Hz, C*H*(3-B)pz), 7.74 (d, 1H, 3*J*HH = 2.3 Hz, C*H*(3-A)pz), 7.79 (d, 1H, 3*J*HH = 1.9 Hz, C*H*(5-B)pz), 7.89 (d, 1H, 3*J*HH = 1.9 Hz, C*H*(5-A)pz). 13C{1H} NMR (CD2Cl2, 20 ºC)  29.4 and 30.7 (s, C*Me2*), 38.3 (s, *C*H2(B)), 43.0 (s, *C*Me2), 60.1 (s, *C*H2(A)), 105.7, 105.8 and 106.2 (s, *C*H(4)pz), 125.9, 126.5, 127.9 and 130.6 (s, *Car*H), 135.1, 135.3 and 137.4 (s, *C*H(3)pz), 138.2, 140.2 and 140.4 (s, *C*H(5)pz), 141.0 (s, *C*(2)ar) and 148.0 (s, *C*(1)ar).

Analytical and spectroscopic data for (**4c**)

Anal. Calc. for C20H24BIN6Pd: C, 40.54, H, 4.08, N, 14.18 Found: C, 41.00, H, 4.24, N, 14.48. 1H NMR (CD2Cl2, 20 ºC)  1.45 and 1.61 (s, 3H, C*Me2*), 3.60 (d, 1H, 2*J*HH = 7.3 Hz, C*H2*(A)), 3.71 (d, 1H, 2*J*HH = 8.7 Hz, C*H2*(B)), 4.92 (d, 1H, 2*J*HH = 7.4 Hz}, C*H2*(A)), 5.06 (d, 1H, 3*J*HH = 2.2 Hz, C*H*(5-C)pz), 5.76 (t, 1H, 3*J*HH = 2.3 Hz, C*H*(4-C)pz), 6.14 (t, 1H, 3*J*HH = 2.1 Hz, C*H*(4-B)pz), 6.26 (t, 1H, 3*J*HH = 2.1 Hz, C*H*(4-A)pz), 6.42 (d, 1H, 2*J*HH = 8.7 Hz, C*H2*(B)), 6.96 (tm, 1H, 3*J*HH = 7.3 Hz, Car*H(4)*), 7.00 (dm, 1H, 3*J*HH = 7.5 Hz, Car*H(3)*), 7.25 (tm, 1H, 3*J*HH = 7.9 Hz, Car*H(5)*), 7.36 (tm, 1H, 3*J*HH = 7.9 Hz, Car*H(6)*), 7.49 (d, 1H, 3*J*HH = 2.7 Hz, C*H*(3-C)pz), 7.57 (d, 1H, 3*J*HH = 2.3 Hz, C*H*(3-B)pz), 7.66 (d, 1H, 3*J*HH = 2.3 Hz, C*H*(3-A)pz), 7.77 (d, 1H, 3*J*HH = 1.9 Hz, C*H*(5-B)pz), 7.91 (d, 1H, 3*J*HH = 1.8 Hz, C*H*(5-A)pz). 13C{1H} NMR (CD2Cl2, 20 ºC)  28.9 and 33.0 (s, C*Me2*), 30.8 (s, *C*H2(B)), 42.7 (s, *C*Me2), 54.4 (s, *C*H2(A)), 105.1, 105.7 and 106.1 (s, *C*H(4)pz), 125.7, 126.4, 127.5 and 130.4 (s, *Car*H), 135.3, 135.4 and 136.6 (s, *C*H(3)pz), 137.7, 141.5 and 141.7 (s, *C*H(5)pz), 141.1 (s, *C*(2)ar) and 148.2 (s, *C*(1)ar).

Spectroscopic data for **3b**:

1H NMR (CD2Cl2, 20 ºC)  1.41 and 1.58 (s, 3H, C*Me2*), 4.36 and 4.83 (d, 1H, 2*J*HH = 6.3 Hz, C*H2*), 6.07 (t, 1H, 3*J*HH = 2.3 Hz, C*H(4)pz*), 6.22 (t, 1H, 3*J*HH = 2.1 Hz, C*H(4)pz*), 6.28 (t, 1H, 3*J*HH = 2.0 Hz, C*H(4)pz*), 6.75 (d, 1H, 3*J*HH = 2.1 Hz, C*Hpz*), 6.81 (tm, 1H, *J*HH = 8.1, 7.0 Hz, Car*H*), 6.98 (dm, 1H, *J*HH = 7.6 Hz, Car*H*), 7.02 (tm, 1H, *J*HH = 8.1 Hz, Car*H*), 7.07 (dm, 1H, *J*HH = 8.1 Hz, Car*H*), 7.66 (m, 3H, C*Hpz*), 7.76 (d, 1H, *J*HH = 1.9 Hz, C*Hpz*) and 7.97 (d, 1H, *J*HH = 1.8 Hz, C*Hpz*). 13C{1H} NMR (CD2Cl2, 20 ºC)  30.7 and 32.0 (s, C*Me2*), 46.1 (s, *C*Me2), 63.1 (s, *C*H2), 105.4, 105.5 and 105.7 (s, *C*H(4)pz), 125.6, 125.8, 126.6 and 131.5 (s, *Car*H), 134.6, 134.9 and 135.9 (s, *C*H(3)pz), 139.2, 139.9 and 140.3 (s, *C*H(5)pz), 146.9 and 159.0 (s, *C*ar).

Spectroscopic data for **3c**:

1H NMR (CD2Cl2, 20 ºC)  1.50 and 1.59 (s, 3H, C*Me2*), 4.27 and 5.04 (d, 1H, 2*J*HH = 6.6 Hz, C*H2*), 6.22 (t, 1H, 3*J*HH = 2.3 Hz, C*H(4)pz*), 6.32 (t, 1H, 3*J*HH = 2.5 Hz, C*H(4)pz*), 6.37 (t, 1H, C*H(4)pz*), 6.83 (d, 1H, C*Hpz*), 6.83 (m, 1H, Car*H*), 7.03 (t, 1H, 3*J*HH = 7.1 Hz, Car*H*), 7.10 (d, 1H, 3*J*HH = 7.6 Hz, Car*H*), 7.19 (d, 1H, 3*J*HH = 8.1 Hz, Car*H*), 7.85 (d, 1H, 3*J*HH = 2.5 Hz, C*Hpz*), 7.88 (d, 1H, 3*J*HH = 2.5 Hz, C*Hpz*), 7.90 (d, 1H, 3*J*HH = 2.5 Hz, C*Hpz*), 7.91 (d, 1H, 3*J*HH = 2.0 Hz, C*Hpz*) and 8.14 (d, 1H, 3*J*HH = 2.0 Hz, C*Hpz*). 13C{1H} NMR (CD2Cl2, 20 ºC)  31.0 and 31.6 (s, C*Me2*), 46.8 (s, *C*Me2), 58.3 (s, *C*H2), 106.7 and 106.8 (s, *C*H(4)pz), 126.6, 126.9, 127.6 and 139.3 (s, *Car*H), 136.1, 136.5 and 136.9 (s, *C*Hpz), 134.0, 142.2 and 142.7 (s, *C*Hpz), 142.2 and 161.7 (s, *C*ar).

**Characterization of 1,1-dimethylindan (5).**

Samples of compounds **4b** and **4c** (0.025mmol in 0.6 mL of CD2Cl2) were allowed to stand at room temperature for one week. The organic product resulting from the decomposition of **4b** and **4c** has been identified by GC-MS and comparison of its 1H NMR spectra with a sample obtained by reaction of 1 with CH2I2 at low temperature.

1H NMR (CD2Cl2, 20 ºC)  1.28 (s, 6H, CMe2), 1.94 (t, 2H, 3*J*HH = 7.5 Hz, C*H2*), 2.91 (t, 2H, 3*J*HH = 7.5 Hz, C*H2*) and 7.15 (m, 4H, C*Har*). 13C{1H} NMR s, C*Me2*), 29.9 (s, *C*H2), 41.3 (s, *C*H2), 43.6 (s, *C*Me2), 121.8, 123.1, 126.2, 126.4 (*Car*H), 142.3, 152.1 (*Car*). GC-EIMS: *m/z* 146(M+), 131 (M+-CH3).

**X-ray Structure Determination of (4b).**

A crystal suitable for X-ray diffraction analysis was mounted onto a glass fiber and transferred to an AFC6S-Rigaku automatic diffractometer (T =290 K, MoK radiation, graphite monochromator,  = 0.71073 Å). Accurate unit cell parameters and an orientation matrix were determined by least-squares fitting from the settings of 25 high-angle reflections. Crystal data and details on data collection and refinements are given in Table ESI-1. Data were collected by the /2 scan method. Lorentz and polarization corrections were applied. Decay was monitored by measuring three standard reflections every 100 measurements. Decay and semiempirical absorption correction ( method) were also applied. The structure was solved by Patterson methods and subsequent expansion of the models using DIRDIF3. Reflections having I > 3(I) were used for structure refinement. All non-hydrogen atoms were anisotropically refined; the hydrogen atoms were included at idealised positions and not refined. All calculations for data reduction, structure solution, and refinement were carried out on a VAX 3520 computer at the Servicio Central de Ciencia y Tecnología de la Universidad de Cádiz, using the TEXSAN4 software system and ORTEP5 for plotting.

# Table ESI-1.- Data for the crystal structure analysis of

Formula C20 H24 B Br N6 Pd

Formula Weight 545.56

Crystal shape, colour irregular, yellow

Crystal size (mm) 0.37x0.25x0.14

Crystal System Triclinic

Space Group P-1 (Number 2)

Unit cell reflections, interval 25, ( 12.5 < 2 < 18.1)

Unit cell parameters a = 10.307(3) 

b = 11.881(3) 

c = 10.056(3) 

 = 107.20(2) 

 = 115.02(2) 

 = 75.17(2) 

Volume V = 1053.8(6) 3

Z (Formula) 2

calc (gr/cm3) 1.719

Diffractometer AFC6S-Rigaku

Radiation Mo K (graphite monochromator)

Wavelenght,  0.7107

F(000) 544.00

Absorption Correction Psi scan (Tmín = 0.709, Tmáx = 1.000)

Decay 3 standard reflections every 100 (-0.30%)

Absorption coefficient,  27.65 cm-1

Temperature 290(1) K

Scan method /2

Scan speed () 4° min-1

Measurement interval 5 < 2 < 50.1

Measured Reflections 3714 (Rint = 0.20)

Observed Reflections (I > 3) 2895

Parameters 262

Reflections/Parameters ratio 11.050

Ra  0.0568

Rw (w = F-2)b 0.0671

g.o.f. 2.597

a R = (Fo - Fc)  Fo

b Rw = [(w(Fo - Fc)2  wFo2)1/2

Table ESI-2. Fractional atomic coordinates and Uiso for

|  | X | Y | Z | Uiso |
| --- | --- | --- | --- | --- |
| Pd(1) | 0.30070(6) | 0.21810(5) | 0.19608(7) | 0.0265(2) |
| Br(1) | 0.11566(9) | 0.19576(8) | 0.2727(1) | 0.0440(3) |
| N(1) | 0.4680(6) | 0.2343(5) | 0.1460(7) | 0.027(2) |
| N(2) | 0.6051(7) | 0.2279(6) | 0.2570(8) | 0.037(2) |
| N(3) | 0.4434(6) | 0.0650(5) | 0.2823(7) | 0.032(2) |
| N(4) | 0.5827(6) | 0.0789(5) | 0.3749(7) | 0.032(2) |
| N(5) | 0.4058(7) | 0.3258(6) | 0.4201(8) | 0.037(2) |
| N(6) | 0.5511(7) | 0.2971(5) | 0.4894(7) | 0.034(2) |
| C(1) | 0.2115(8) | 0.1112(7) | -0.0107(9) | 0.035(2) |
| C(2) | 0.0772(8) | 0.1575(7) | -0.1385(9) | 0.033(2) |
| C(3) | 0.0631(9) | 0.0548(8) | -0.272(1) | 0.046(3) |
| C(4) | -0.0623(9) | 0.1810(8) | -0.110(1) | 0.045(3) |
| C(5) | 0.1013(8) | 0.2703(7) | -0.1632(9) | 0.032(2) |
| C(6) | 0.0777(10) | 0.2823(8) | -0.305(1) | 0.046(3) |
| C(7) | 0.102(1) | 0.3844(10) | -0.327(1) | 0.056(3) |
| C(8) | 0.153(1) | 0.4742(8) | -0.208(1) | 0.053(3) |
| C(9) | 0.1767(9) | 0.4641(7) | -0.067(1) | 0.043(3) |
| C(10) | 0.1496(8) | 0.3654(7) | -0.0408(9) | 0.032(2) |
| C(11) | 0.1730(8) | 0.3661(7) | 0.1145(10) | 0.037(2) |
| C(12) | 0.4791(9) | 0.2555(8) | 0.0287(10) | 0.040(2) |
| C(13) | 0.6244(10) | 0.2617(8) | 0.061(1) | 0.048(3) |
| C(14) | 0.6958(8) | 0.2421(7) | 0.203(1) | 0.038(2) |
| C(15) | 0.4296(9) | -0.0464(7) | 0.2751(10) | 0.038(2) |
| C(16) | 0.5599(9) | -0.1037(7) | 0.3605(10) | 0.039(2) |
| C(17) | 0.6521(9) | -0.0219(7) | 0.4223(10) | 0.038(2) |
| C(18) | 0.3625(10) | 0.4129(8) | 0.517(1) | 0.045(3) |
| C(19) | 0.478(1) | 0.4437(8) | 0.649(1) | 0.054(3) |
| C(20) | 0.595(1) | 0.3684(8) | 0.626(1) | 0.051(3) |
| B(1) | 0.6342(9) | 0.1974(9) | 0.405(1) | 0.039(3) |
| H(1) | 0.2867 | 0.0814 | -0.0494 | 0.0410 |
| H(2) | 0.1865 | 0.0466 | 0.0068 | 0.0410 |
| H(3) | 0.0506 | -0.0129 | -0.2502 | 0.0549 |
| H(4) | -0.0182 | 0.0759 | -0.3566 | 0.0549 |
| H(5) | 0.1484 | 0.0377 | -0.2935 | 0.0549 |
| H(6) | -0.0588 | 0.2463 | -0.0271 | 0.0526 |
| H(7) | -0.1429 | 0.2006 | -0.1971 | 0.0526 |
| H(8) | -0.0744 | 0.1124 | -0.0898 | 0.0526 |
| H(9) | 0.0436 | 0.2201 | -0.3896 | 0.0546 |
| H(10) | 0.0806 | 0.3928 | -0.4251 | 0.0656 |
| H(11) | 0.1721 | 0.5430 | -0.2225 | 0.0630 |
| H(12) | 0.2119 | 0.5275 | 0.0151 | 0.0505 |
| H(13) | 0.0805 | 0.3736 | 0.1186 | 0.0440 |
| H(14) | 0.2169 | 0.4343 | 0.1781 | 0.0440 |
| H(15) | 0.4016 | 0.2652 | -0.0628 | 0.0469 |
| H(16) | 0.6643 | 0.2755 | -0.0019 | 0.0562 |
| H(17) | 0.7975 | 0.2392 | 0.2563 | 0.0450 |
| H(18) | 0.3431 | -0.0808 | 0.2191 | 0.0453 |
| H(19) | 0.5801 | -0.1827 | 0.3737 | 0.0456 |
| H(20) | 0.7498 | -0.0345 | 0.4879 | 0.0445 |
| H(21) | 0.2642 | 0.4493 | 0.4984 | 0.0528 |
| H(22) | 0.4775 | 0.5030 | 0.7355 | 0.0645 |
| H(23) | 0.6937 | 0.3651 | 0.6967 | 0.0609 |
| H(24) | 0.7353 | 0.1916 | 0.4652 | 0.0457 |

Table ESI-3. Anisotropic Thermal Parameters for

|  | U11 | U22 | U33 | U12 | U13 | U23 |
| --- | --- | --- | --- | --- | --- | --- |
| Pd(1) | 0.0154(3) | 0.0253(3) | 0.0306(3) | -0.0042(2) | 0.0001(2) | 0.0062(2) |
| Br(1) | 0.0284(5) | 0.0526(6) | 0.0534(6) | -0.0075(4) | 0.0130(4) | 0.0173(5) |
| N(1) | 0.019(3) | 0.034(4) | 0.023(3) | -0.003(3) | 0.002(3) | 0.007(3) |
| N(2) | 0.019(3) | 0.034(4) | 0.049(4) | -0.006(3) | 0.004(3) | 0.010(3) |
| N(3) | 0.021(3) | 0.026(3) | 0.036(4) | -0.004(3) | -0.001(3) | 0.008(3) |
| N(4) | 0.019(3) | 0.030(4) | 0.035(4) | -0.004(3) | -0.002(3) | 0.006(3) |
| N(5) | 0.028(4) | 0.033(4) | 0.041(4) | -0.007(3) | 0.005(3) | 0.006(3) |
| N(6) | 0.027(4) | 0.027(4) | 0.031(4) | -0.007(3) | -0.006(3) | 0.008(3) |
| C(1) | 0.023(4) | 0.029(4) | 0.044(5) | -0.008(3) | 0.003(4) | 0.007(4) |
| C(2) | 0.022(4) | 0.031(4) | 0.042(5) | -0.008(3) | 0.005(4) | 0.007(4) |
| C(3) | 0.038(5) | 0.039(5) | 0.044(5) | -0.015(4) | -0.005(4) | 0.008(4) |
| C(4) | 0.024(4) | 0.052(6) | 0.057(6) | -0.009(4) | 0.004(4) | 0.023(5) |
| C(5) | 0.020(4) | 0.032(5) | 0.034(5) | -0.005(3) | 0.000(4) | 0.010(4) |
| C(6) | 0.040(5) | 0.044(5) | 0.043(5) | -0.007(4) | 0.004(4) | 0.011(4) |
| C(7) | 0.052(6) | 0.068(7) | 0.054(6) | -0.007(5) | 0.016(5) | 0.030(6) |
| C(8) | 0.054(6) | 0.045(6) | 0.064(7) | -0.011(5) | 0.018(5) | 0.020(5) |
| C(9) | 0.036(5) | 0.031(5) | 0.058(6) | -0.005(4) | 0.011(4) | 0.013(4) |
| C(10) | 0.016(4) | 0.028(4) | 0.041(5) | 0.002(3) | 0.001(3) | 0.012(4) |
| C(11) | 0.029(4) | 0.019(4) | 0.053(5) | 0.002(3) | 0.007(4) | 0.009(4) |
| C(12) | 0.028(4) | 0.042(5) | 0.039(5) | -0.005(4) | 0.005(4) | 0.004(4) |
| C(13) | 0.039(5) | 0.045(5) | 0.067(7) | -0.013(4) | 0.028(5) | 0.004(5) |
| C(14) | 0.019(4) | 0.030(4) | 0.061(6) | -0.002(3) | 0.009(4) | 0.012(4) |
| C(15) | 0.035(5) | 0.031(4) | 0.045(5) | -0.009(4) | 0.010(4) | 0.006(4) |
| C(16) | 0.041(5) | 0.026(4) | 0.042(5) | -0.004(4) | 0.007(4) | 0.011(4) |
| C(17) | 0.028(4) | 0.036(5) | 0.040(5) | 0.009(4) | 0.006(4) | 0.017(4) |
| C(18) | 0.046(5) | 0.033(5) | 0.050(6) | -0.003(4) | 0.019(5) | 0.004(4) |
| C(19) | 0.063(7) | 0.037(5) | 0.042(6) | -0.013(5) | 0.009(5) | -0.008(4) |
| C(20) | 0.053(6) | 0.039(5) | 0.047(6) | -0.020(5) | 0.000(5) | 0.005(4) |
| B(1) | 0.015(4) | 0.041(6) | 0.044(6) | -0.009(4) | -0.008(4) | 0.011(5) |

Table ESI-4. Selected Bond Lengths (in Å) for

| Pd(1) | Br(1) | 2.434(1) | C(5) | C(6) | 1.39(1) |
| --- | --- | --- | --- | --- | --- |
| Pd(1) | N(1) | 2.056(6) | C(5) | C(10) | 1.41(1) |
| Pd(1) | N(3) | 2.170(6) | C(6) | C(7) | 1.39(1) |
| Pd(1) | N(5) | 2.197(7) | C(6) | H(9) | 0.9506 |
| Pd(1) | C(1) | 2.049(8) | C(7) | C(8) | 1.36(1) |
| Pd(1) | C(11) | 2.062(7) | C(7) | H(10) | 0.9507 |
| N(1) | N(2) | 1.382(8) | C(8) | C(9) | 1.37(1) |
| N(1) | C(12) | 1.33(1) | C(8) | H(11) | 0.9508 |
| N(2) | C(14) | 1.330(10) | C(9) | C(10) | 1.39(1) |
| N(2) | B(1) | 1.53(1) | C(9) | H(12) | 0.9485 |
| N(3) | N(4) | 1.362(8) | C(10) | C(11) | 1.47(1) |
| N(3) | C(15) | 1.345(10) | C(11) | H(13) | 0.9516 |
| N(4) | C(17) | 1.335(9) | C(11) | H(14) | 0.9523 |
| N(4) | B(1) | 1.53(1) | C(12) | C(13) | 1.41(1) |
| N(5) | N(6) | 1.358(9) | C(12) | H(15) | 0.9446 |
| N(5) | C(18) | 1.33(1) | C(13) | C(14) | 1.36(1) |
| N(6) | C(20) | 1.34(1) | C(13) | H(16) | 0.9525 |
| N(6) | B(1) | 1.53(1) | C(14) | H(17) | 0.9517 |
| C(1) | C(2) | 1.55(1) | C(15) | C(16) | 1.38(1) |
| C(1) | H(1) | 0.9536 | C(15) | H(18) | 0.9506 |
| C(1) | H(2) | 0.9523 | C(16) | C(17) | 1.36(1) |
| C(2) | C(3) | 1.51(1) | C(16) | H(19) | 0.9437 |
| C(2) | C(4) | 1.52(1) | C(17) | H(20) | 0.9436 |
| C(2) | C(5) | 1.53(1) | C(18) | C(19) | 1.38(1) |
| C(3) | H(3) | 0.9474 | C(18) | H(21) | 0.9543 |
| C(3) | H(4) | 0.9497 | C(19) | C(20) | 1.37(1) |
| C(3) | H(5) | 0.9491 | C(19) | H(22) | 0.9462 |
| C(4) | H(6) | 0.9529 | C(20) | H(23) | 0.9585 |
| C(4) | H(7) | 0.9561 | B(1) | H(24) | 0.9540 |
| C(4) | H(8) | 0.9462 |  |  |  |

Table ESI-5. Selected Angles (in  ) for

| Br(1) | Pd(1) | N(1) | 175.8(2) | C(2) | C(5) | C(6) | 121.6(7) |
| --- | --- | --- | --- | --- | --- | --- | --- |
| Br(1) | Pd(1) | N(3) | 91.8(2) | C(2) | C(5) | C(10) | 120.5(7) |
| Br(1) | Pd(1) | N(5) | 90.2(2) | C(6) | C(5) | C(10) | 117.9(7) |
| Br(1) | Pd(1) | C(1) | 90.9(2) | C(5) | C(6) | C(7) | 121.4(9) |
| Br(1) | Pd(1) | C(11) | 90.6(2) | C(5) | C(6) | H(9) | 119.7194 |
| N(1) | Pd(1) | N(3) | 85.1(2) | C(7) | C(6) | H(9) | 118.8411 |
| N(1) | Pd(1) | N(5) | 86.9(2) | C(6) | C(7) | C(8) | 120.5(9) |
| N(1) | Pd(1) | C(1) | 91.9(3) | C(6) | C(7) | H(10) | 120.4172 |
| N(1) | Pd(1) | C(11) | 92.5(3) | C(8) | C(7) | H(10) | 119.0462 |
| N(3) | Pd(1) | N(5) | 86.6(2) | C(7) | C(8) | C(9) | 118.8(8) |
| N(3) | Pd(1) | C(1) | 90.8(3) | C(7) | C(8) | H(11) | 120.4587 |
| N(3) | Pd(1) | C(11) | 177.4(3) | C(9) | C(8) | H(11) | 120.6946 |
| N(5) | Pd(1) | C(1) | 177.2(3) | C(8) | C(9) | C(10) | 122.5(9) |
| N(5) | Pd(1) | C(11) | 92.5(3) | C(8) | C(9) | H(12) | 118.3960 |
| C(1) | Pd(1) | C(11) | 90.1(3) | C(10) | C(9) | H(12) | 119.0703 |
| Pd(1) | N(1) | N(2) | 117.4(5) | C(5) | C(10) | C(9) | 118.6(8) |
| Pd(1) | N(1) | C(12) | 135.3(5) | C(5) | C(10) | C(11) | 123.4(7) |
| N(2) | N(1) | C(12) | 107.2(6) | C(9) | C(10) | C(11) | 118.0(7) |
| N(1) | N(2) | C(14) | 107.7(6) | Pd(1) | C(11) | C(10) | 116.1(5) |
| N(1) | N(2) | B(1) | 121.4(6) | Pd(1) | C(11) | H(13) | 108.1991 |
| C(14) | N(2) | B(1) | 130.7(7) | Pd(1) | C(11) | H(14) | 108.1646 |
| Pd(1) | N(3) | N(4) | 117.6(4) | C(10) | C(11) | H(13) | 107.5397 |
| Pd(1) | N(3) | C(15) | 136.0(5) | C(10) | C(11) | H(14) | 107.5898 |
| N(4) | N(3) | C(15) | 106.3(6) | H(13) | C(11) | H(14) | 109.1247 |
| N(3) | N(4) | C(17) | 109.3(6) | N(1) | C(12) | C(13) | 110.0(8) |
| N(3) | N(4) | B(1) | 119.3(6) | N(1) | C(12) | H(15) | 125.4372 |
| C(17) | N(4) | B(1) | 131.5(7) | C(13) | C(12) | H(15) | 124.5696 |
| Pd(1) | N(5) | N(6) | 117.3(5) | C(12) | C(13) | C(14) | 103.8(8) |
| Pd(1) | N(5) | C(18) | 136.2(6) | C(12) | C(13) | H(16) | 128.4942 |
| N(6) | N(5) | C(18) | 106.3(7) | C(14) | C(13) | H(16) | 127.7320 |
| N(5) | N(6) | C(20) | 109.1(7) | N(2) | C(14) | C(13) | 111.3(7) |
| N(5) | N(6) | B(1) | 119.1(6) | N(2) | C(14) | H(17) | 124.2710 |
| C(20) | N(6) | B(1) | 131.8(7) | C(13) | C(14) | H(17) | 124.3833 |
| Pd(1) | C(1) | C(2) | 122.6(5) | N(3) | C(15) | C(16) | 109.9(7) |
| Pd(1) | C(1) | H(1) | 106.1731 | N(3) | C(15) | H(18) | 125.0926 |
| Pd(1) | C(1) | H(2) | 106.2332 | C(16) | C(15) | H(18) | 125.0006 |
| C(2) | C(1) | H(1) | 106.1591 | C(15) | C(16) | C(17) | 105.3(7) |
| C(2) | C(1) | H(2) | 106.2781 | C(15) | C(16) | H(19) | 127.1765 |
| H(1) | C(1) | H(2) | 108.9574 | C(17) | C(16) | H(19) | 127.5061 |
| C(1) | C(2) | C(3) | 103.9(6) | N(4) | C(17) | C(16) | 109.2(7) |
| C(1) | C(2) | C(4) | 113.0(7) | N(4) | C(17) | H(20) | 125.4544 |
| C(1) | C(2) | C(5) | 110.1(6) | C(16) | C(17) | H(20) | 125.3393 |
| C(3) | C(2) | C(4) | 106.8(7) | N(5) | C(18) | C(19) | 111.1(8) |
| C(3) | C(2) | C(5) | 112.8(7) | N(5) | C(18) | H(21) | 124.1034 |
| C(4) | C(2) | C(5) | 110.1(6) | C(19) | C(18) | H(21) | 124.8271 |
| C(2) | C(3) | H(3) | 109.2880 | C(18) | C(19) | C(20) | 104.3(8) |
| C(2) | C(3) | H(4) | 109.3274 | C(18) | C(19) | H(22) | 128.2233 |
| C(2) | C(3) | H(5) | 109.1452 | C(20) | C(19) | H(22) | 127.4408 |
| H(3) | C(3) | H(4) | 109.7230 | N(6) | C(20) | C(19) | 109.1(8) |
| H(3) | C(3) | H(5) | 109.7664 | N(6) | C(20) | H(23) | 124.6633 |
| H(4) | C(3) | H(5) | 109.5746 | C(19) | C(20) | H(23) | 126.2117 |
| C(2) | C(4) | H(6) | 109.6942 | N(2) | B(1) | N(4) | 109.9(7) |
| C(2) | C(4) | H(7) | 109.5721 | N(2) | B(1) | N(6) | 108.6(7) |
| C(2) | C(4) | H(8) | 110.0116 | N(2) | B(1) | H(24) | 109.7676 |
| H(6) | C(4) | H(7) | 108.7103 | N(4) | B(1) | N(6) | 109.7(7) |
| H(6) | C(4) | H(8) | 109.5532 | N(4) | B(1) | H(24) | 109.6545 |
| H(7) | C(4) | H(8) | 109.2774 | N(6) | B(1) | H(24) | 109.3299 |

Figure ESI-2. ORTEP diagram of


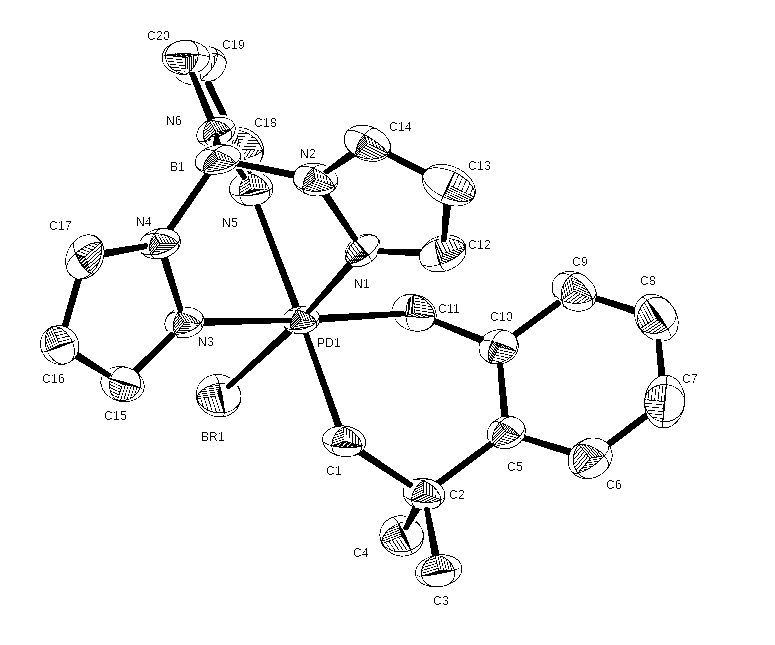


**References:**

(1) J. Campora, J. A. López, P. Palma, D. del Río, E. Carmona, P. Valerga, C. Graiff, A. Tiripicchio, *Inorg. Chem.* **2001**, *40*, 4116.

(2) (a) S. Trofimenko, *Inorg. Synth*. **1970**, *12*, 99. (b) S. Trofimenko, *J. Am. Chem. Soc.* **1967**, *89*, 6288.

(3) P. T. Beursken, DIRDIF, Technical Report 1984/1, Crystallography Laboratory, Toernooiveld, 1984.

(4) TEXSAN, Single-Crystal Structure Analysis Software, version 5.0, Molecular Structure Corporation, Houston, TX, 1989.

(5) C. K. Johnson, ORTEP, A Thermal Ellipsoid Plotting Program, Oak Ridge National Laboratory, Oak Ridge, TN, 1965.
